# Supplementary material for: Preparation of highly dispersed metallic Pt nanoparticle catalysts for low-temperature propene combustion
Source: Royal Society of Chemistry journal article supplement (doi:10.1039/d3nj01205k), 2023-01-01
Supplement: d3nj01205k1.pdf [file d3nj01205k1.pdf]

# Preparation of highly dispersed metallic Pt nanoparticle catalysts for low-temperature propene combustion

Bei Huang,<sup>a</sup> Ke Wang,<sup>a</sup> Fanxing Zhang,<sup>a</sup> Xianfeng Shen,<sup>a</sup> Kewu Yang,<sup>a</sup> Yi He,<sup>\*a</sup>

Keping Yan,<sup>a,b</sup> Yao Shi,<sup>a</sup> and Pengfei Xie<sup>\*a,b</sup>

<sup>a</sup> *College of Chemical and Biological Engineering, Zhejiang University, Hangzhou  
310027, China*

<sup>b</sup> *Shanxi-Zheda Institute of Advanced Materials and Chemical Engineering, Taiyuan,  
030032, China*

**Catalyst characterization.** The dispersion of platinum in the catalysts was determined by H<sub>2</sub>–O<sub>2</sub> titration on VDsorb-91i apparatus equipped with a thermal conductivity detector (TCD). In a typical test, 50 mg of catalyst was placed in a quartz tube reactor and activated in 10% H<sub>2</sub>/Ar (30 ml min<sup>-1</sup>) at 200°C for 1 h; the catalyst was then purged with helium (30 ml min<sup>-1</sup>) at the same temperature for another 0.5 h, after which it was cooled down to 50°C. Subsequently, the O<sub>2</sub> titration of the catalyst was performed by pulsing 5% O<sub>2</sub>/He into the reactor several times at 50°C until the consumption of O<sub>2</sub> became negligible. Then, H<sub>2</sub> titration was carried out in the same way, 10% H<sub>2</sub>/Ar was pulsed into the reactor several times to reach equilibrium adsorption. The platinum dispersion (D%) was calculated by the following equation:

$$\text{Dispersion (\%)} = 100 \times V_{\text{H}_2} \times \frac{2}{3} \times \text{MW}_{\text{Pt}} / (W_{\text{Pt}} \times 22414)$$

Where  $V_{\text{H}_2}$  is the volume of adsorbed H<sub>2</sub> (mL),  $\text{MW}_{\text{Pt}}$  is the atomic weight of Pt (g·mol<sup>-1</sup>), and  $W_{\text{Pt}}$  is the weight of Pt supported on the sample (g).

DRIFTS was performed upon CO adsorption using a Nicolet 6700 (Thermo Scientific) equipped with a mercury-cadmium-telluride (MCT) detector. The catalyst powders were placed in an in-situ cell. The cell was purged with a stream of N<sub>2</sub> at 200°C for 1 h to remove water and impurities and cooled to room temperature under a stream of N<sub>2</sub> flow. After background collection under N<sub>2</sub> at 20°C, the catalysts were saturated with 5% CO/N<sub>2</sub> gas for 30 min, and DRIFT spectra were collected under vacuum subsequently.

**Catalyst Oxidation Tests of C<sub>3</sub>H<sub>8</sub>, CO, NO.** The same pretreatment and gas hourly space velocity conditions for light-off tests of C<sub>3</sub>H<sub>6</sub> were applied in oxidation experiments of C<sub>3</sub>H<sub>8</sub>, CO, NO. 140 mg of samples (40–60 mesh) was used and the total gas velocity is 350 mL min<sup>-1</sup> for oxidation experiments of C<sub>3</sub>H<sub>8</sub>, CO, NO. For C<sub>3</sub>H<sub>8</sub> oxidation test, the reactant gas is made up of 1000 ppm C<sub>3</sub>H<sub>8</sub>, 12 vol% O<sub>2</sub>, and Ar as balance gas. For CO oxidation test, the reactant gas is made up of 2000 ppm CO, 12 vol% O<sub>2</sub>, and Ar as balance gas. For NO oxidation test, the reactant gas is made up of 200 ppm NO, 12 vol% O<sub>2</sub>, and Ar as balance gas. A Shimadzu GC-2014 instrument was utilized to determine the concentration of C<sub>3</sub>H<sub>8</sub> and CO in the inlet and outlet of reactor. The online NO–NO<sub>2</sub>–NO<sub>x</sub> analyzer (Thermo Scientific 42i-HL) was used to determine the concentration of NO in the inlet and outlet of reactor.

**Table S1** Comparison of T<sub>50</sub> and T<sub>90</sub> of Pt-RD catalysts

| Catalysts                | T <sub>50</sub> (°C) | T <sub>90</sub> (°C) |
|--------------------------|----------------------|----------------------|
| 1% Pt-RD <sub>1</sub>    | 104.5                | 120.0                |
| 1% Pt-RD <sub>2</sub>    | 96.0                 | 108.0                |
| 1% Pt-RD <sub>3</sub>    | 95.0                 | 101.0                |
| 1% Pt-RD <sub>3</sub> -H | 104.0                | 109.0                |
| 1.5% Pt-RD <sub>3</sub>  | 95.5                 | 104.0                |

**Table S2** Comparison of some representative catalysts for propene combustion

| Catalyst                                            | Reactant composition                                                                  | Space velocity/flow<br>rate                     | T <sub>90</sub><br>(°C) | Ref. |
|-----------------------------------------------------|---------------------------------------------------------------------------------------|-------------------------------------------------|-------------------------|------|
| 1% Pt/Al <sub>2</sub> O <sub>3</sub><br>(This work) | 1000 ppm C <sub>3</sub> H <sub>6</sub> , 12% O <sub>2</sub> , Ar balance              | 150000 mL h <sup>-1</sup><br>gcat <sup>-1</sup> | 100                     | —    |
| 1% Pt/Al <sub>2</sub> O <sub>3</sub> <sup>a</sup>   | 600 ppm C <sub>3</sub> H <sub>6</sub> , 1% O <sub>2</sub> ,<br>He balance             | 50000 h <sup>-1</sup>                           | <180                    | 1    |
| 0.8% Pd/TiO <sub>2</sub>                            | 1000 ppm C <sub>3</sub> H <sub>6</sub> , 9% O <sub>2</sub> ,<br>air balance           | 35000 h <sup>-1</sup>                           | 162                     | 2    |
| 1% Au/TiO <sub>2</sub>                              | 1000 ppm C <sub>3</sub> H <sub>6</sub> , 9% O <sub>2</sub> ,<br>He balance            | 35000 h <sup>-1</sup>                           | <275                    | 3    |
| 2% Pt/BaO/Al <sub>2</sub> O <sub>3</sub>            | 800 ppm C <sub>3</sub> H <sub>6</sub> , 2% O <sub>2</sub> ,<br>N <sub>2</sub> balance | 1000 mL min <sup>-1</sup>                       | 225                     | 4    |
| 1% Au/CeO <sub>2</sub> <sup>b</sup>                 | 1200 ppm C <sub>3</sub> H <sub>6</sub> , 9% O <sub>2</sub> ,<br>He balance            | 150 mL min <sup>-1</sup>                        | 190                     | 5    |

---

|                            |                                                              |                          |      |   |
|----------------------------|--------------------------------------------------------------|--------------------------|------|---|
| 0.5% Pd-1%                 | 1000 ppm C <sub>3</sub> H <sub>6</sub> , air                 |                          |      |   |
| Au/TiO <sub>2</sub>        | balance                                                      | 100 mL min <sup>-1</sup> | <225 | 6 |
| 3% Au-3%                   | 1200 ppm C <sub>3</sub> H <sub>6</sub> , 9% O <sub>2</sub> , |                          |      |   |
| Ir/TiO <sub>2</sub>        | He balance                                                   | 7800 h <sup>-1</sup>     | <200 | 7 |
| 1% Pt/Al-PILC <sup>c</sup> | 0.5% C <sub>3</sub> H <sub>6</sub> , 10% O <sub>2</sub> ,    |                          |      |   |
|                            | He balance                                                   | 2000 h <sup>-1</sup>     | 250  | 8 |

---

<sup>a</sup>Catalyst with Pt dispersion of 0.81. <sup>b</sup>Catalyst was first activated in a H<sub>2</sub> stream. <sup>c</sup>Al-PILC: Al-pillared montmorillonite.

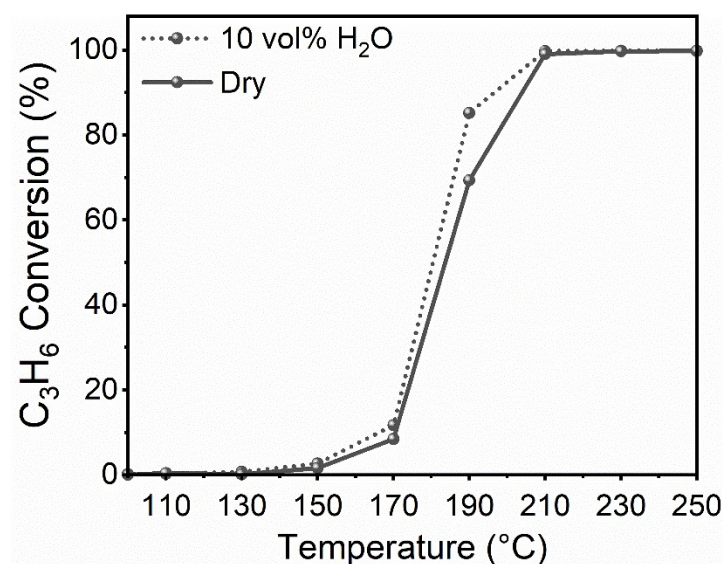

**Fig. S1** Light-off curves of the 1% Pt-IW sample in dry conditions and with 10% steam.

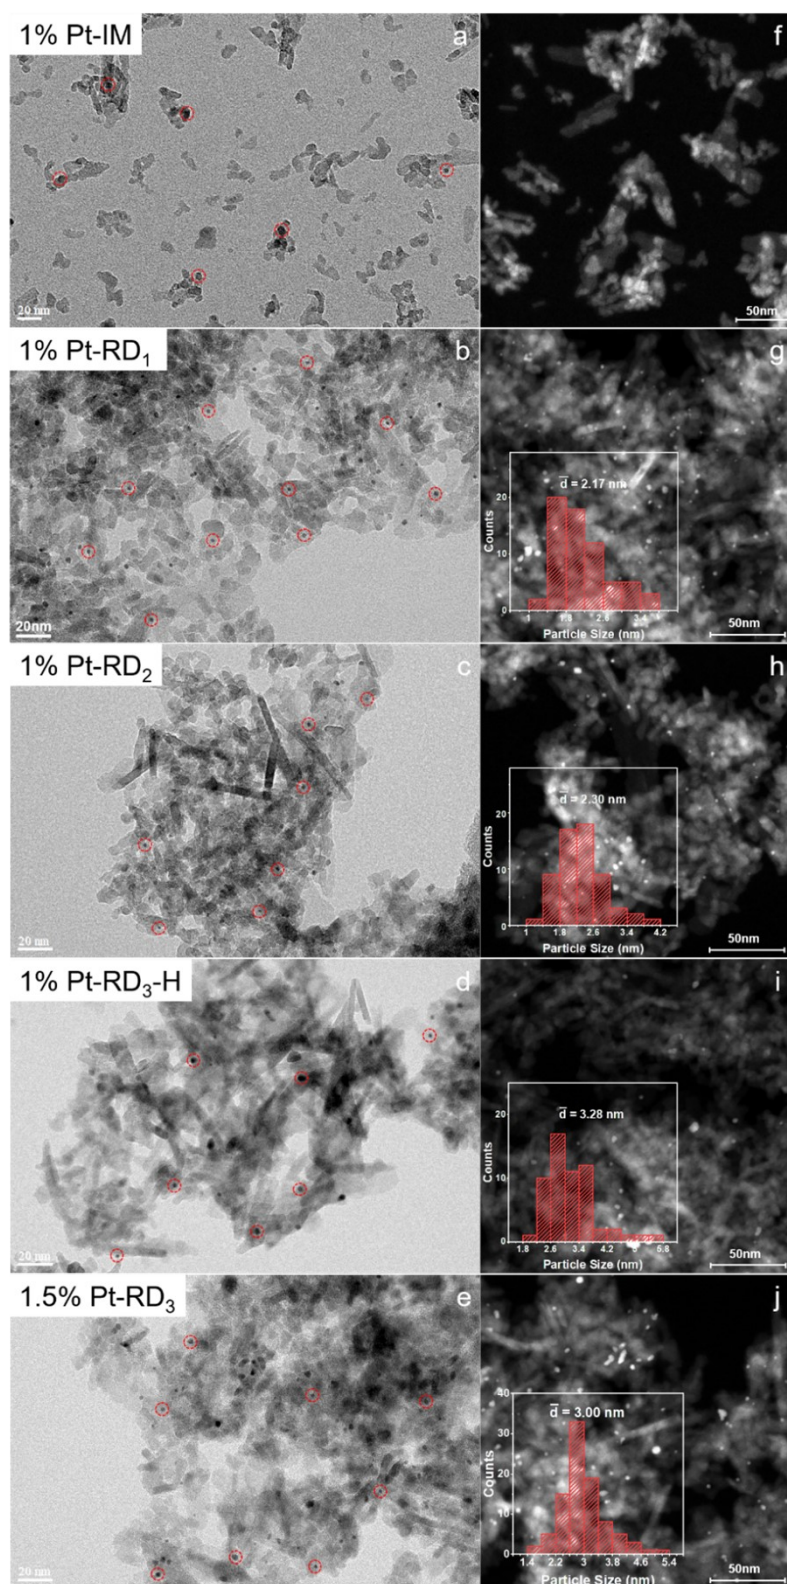

**Fig. S2** (a–e) The HR-TEM and HAADF-STEM images of 1% Pt-IW, 1% Pt-RD<sub>1</sub>, 1% Pt-RD<sub>2</sub>, 1% Pt-RD<sub>3</sub>-H, 1.5% Pt-RD<sub>3</sub> catalysts (with the images of Pt particles size distribution inserted).

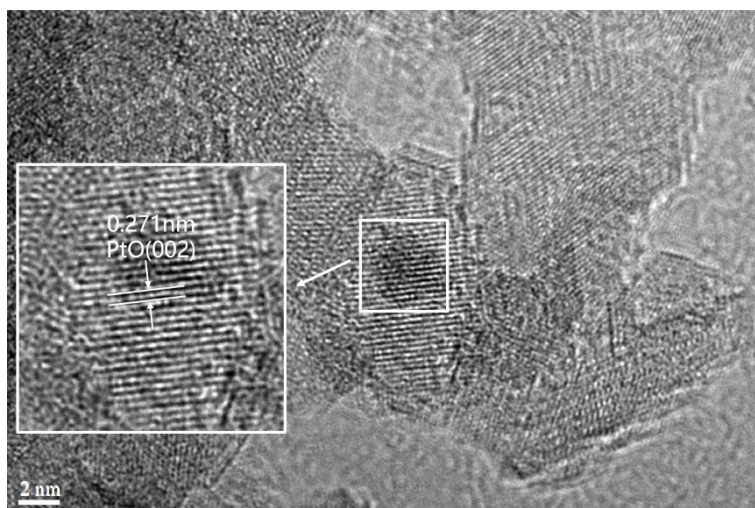

Fig. S3 The HRTEM image of 1% Pt-RD<sub>3</sub> catalyst.

## References

- 1 M. Haneda, T. Watanabe, N. Kamiuchi and M. Ozawa, *Appl. Catal., B*, 2013, **142–143**, 8–14.
- 2 S. Gil, J. Garcia-Vargas, L. Liotta, G. Pantaleo, M. Ousmane, L. Retailleau and A. Giroir-Fendler, *Catalysts*, 2015, **5**, 671–689.
- 3 M. Ousmane, L. F. Liotta, G. Pantaleo, A. M. Venezia, G. Di Carlo, M. Aouine, L. Retailleau and A. Giroir-Fendler, *Catal. Today*, 2011, **176**, 7–13.
- 4 J. Wan, R. Ran, M. Li, X. Wu and D. Weng, *J. Mol. Catal. A: Chem.*, 2014, **383–384**, 194–202.
- 5 P. Lakshmanan, L. Delannoy, V. Richard, C. Méthivier, C. Potvin and C. Louis, *Appl. Catal., B*, 2010, **96**, 117–125.
- 6 M. Hosseini, S. Siffert, H. L. Tidahy, R. Cousin, J. F. Lamonier, A. Aboukais, A. Vantomme, M. Roussel and B. L. Su, *Catal. Today*, 2007, **122**, 391–396.

- 7 A. Aguilar-Tapia, R. Zanella, C. Calers, C. Louis and L. Delannoy, *Phys. Chem. Chem. Phys.*, 2015, **17**, 28022–28032.
- 8 A. Aznárez, A. Gil and S. A. Korili, *RSC Adv.*, 2015, **5**, 82296–82309.
